# Supplementary material for: Highly thermally conductive and electrically insulating polymer nanocomposites with boron nitride nanosheet/ionic liquid complexes
Source: Royal Society of Chemistry journal article supplement (doi:10.1039/c7ra06691k), 2017-01-01
Supplement: c7ra06691k1.pdf [file c7ra06691k1.pdf]

## Supplementary Information

# Highly thermally conductive and electrically insulating polymer nanocomposites with boron nitride nanosheet/ionic liquid complexes

Takuya Morishita\* and Naoko Takahashi

Toyota Central R&D Labs., Inc., Nagakute, Aichi 480-1192, Japan

\*Corresponding author. E-mail: [morishita-t@mosk.tytlabs.co.jp](mailto:morishita-t@mosk.tytlabs.co.jp)

### Contents:

|                                                                                                            |     |
|------------------------------------------------------------------------------------------------------------|-----|
| 1. Preparation of boron nitride nanosheet (BNNS)/ionic liquid (IL)/polycarbonate (PC) composite films..... | S-2 |
| 2. Preparation of hexagonal boron nitride (h-BN)/poly(methyl methacrylate) (PMMA) composite films .....    | S-2 |
| 3. Supplementary tables and figures .....                                                                  | S-3 |
| 4. References.....                                                                                         | S-7 |

### **1. Preparation of BNNS/IL/PC composite films (BNNS content, 50 wt%)**

First, 157.1 mg of BNNS/1-butyl-3-methylimidazolium hexafluorophosphate ([bmim][PF<sub>6</sub>]) complex, containing 150 mg of BNNS and 7.1 mg of [bmim][PF<sub>6</sub>], was added to 1.0 g of 1,1,1,3,3,3-hexafluoro-2-propanol (HFIP). After the mixture was bath-sonicated for 20 min, it was mixed with PC/HFIP (142.9 mg/2.0 g) solution under bath-sonication for 30 min. The resulting BNNS/[bmim][PF<sub>6</sub>]/PC/HFIP solution was spread on a glass plate. Then HFIP was naturally volatilized for at least 24 h. BNNS/[bmim][PF<sub>6</sub>]/PC (BNNS content, 50 wt%  $\approx$  35 vol%) composite films with approx. 0.3 mm thickness were obtained after further drying at 50 °C for 12 h under vacuum to remove the residual HFIP.

### **2. Preparation of h-BN/PMMA composite films (h-BN content, 2 wt%)**

After 60.0 mg of h-BN (UHP-1K) was added to 2.0 g of acetone, it was bath-sonicated for 20 min. The h-BN/acetone mixture was mixed with a PMMA/acetone (3.0 g/8.0 g) solution under bath-sonication for 30 min. The resulting h-BN/PMMA/acetone solution was spread on a glass plate. Acetone was naturally volatilized for at least 24 h. h-BN/PMMA (h-BN content, 2 wt%  $\approx$  1.1 vol%) composite films with approx. 0.3 mm thickness were obtained after further drying at 50 °C for 12 h under vacuum to remove residual acetone.

### 3. Supplementary tables and figures

**Table S1** Thermal conductivities of the BNNS/IL/PMMA composites in this study, and previously reported BNNS/polymer composites.<sup>S1–S15</sup>

| BNNS/polymer composites                       | Polymer type         | BNNS content       | Thermal conductivity (W m <sup>-1</sup> K <sup>-1</sup> ) |          | Year [reference] |
|-----------------------------------------------|----------------------|--------------------|-----------------------------------------------------------|----------|------------------|
|                                               |                      |                    | Through-plane                                             | In-plane |                  |
| BNNS/IL/PMMA                                  | Thermoplastic        | 50 wt% (≈ 34 vol%) | 5.4                                                       | 7.3      | This work        |
| BNNS/PMMA                                     |                      | 14 wt%             | 1.2                                                       | –        | 2017 [S1]        |
| BNNS/PMMA                                     |                      | 23 wt%             | 2.6                                                       | –        | 2012 [S2]        |
| BNNS/polyrhodanine/styrene-butadiene rubber   |                      | 27.5 vol%          | 0.75                                                      | 1.5      | 2017 [S3]        |
| BNNS/polyamide-6                              |                      | 40 wt%             | 2.5                                                       | –        | 2017 [S4]        |
| BNNS/poly(vinyl alcohol)                      |                      | 50 wt%             | ~0.85                                                     | ~7       | 2016 [S5]        |
| microplasma-treated BNNS/poly(vinyl alcohol)  |                      | 50 wt%             | ~2.1                                                      | 13       |                  |
| BNNS/polyamide-66                             |                      | 50 vol%            | ~1.2                                                      | –        | 2013 [S6]        |
| BNNS/poly(vinyl alcohol)                      |                      | 50 vol%            | –                                                         | 13       | 2012 [S7]        |
| BNNS/polystyrene                              |                      | 67 vol%            | 1.1                                                       | –        | 2015 [S8]        |
| BNNS/HSO <sub>3</sub> Cl/PMMA                 |                      | 80 wt%             | 10.2                                                      | 14.7     | 2016 [S9]        |
| BNNS/poly(vinyl alcohol)                      |                      | 94 wt%             | –                                                         | 6.9      | 2015 [S10]       |
| BNNS/Ag nanoparticle/liquid crystalline epoxy |                      | Thermoset          | 25.1 vol%                                                 | –        | 12.6             |
| BNNS/epoxy                                    | 40 wt%               |                    | 6.0                                                       | –        | 2014 [S12]       |
| BNNS/epoxy                                    | 50 vol%              |                    | 9.8                                                       | –        | 2015 [S13]       |
| BNNS/epoxy                                    | 50 vol%              |                    | –                                                         | 30       | 2012 [S7]        |
| BNNS/graphene oxide/polyimide                 | 50 wt%               |                    | 2.1                                                       | –        | 2014 [S14]       |
| BNNS/epoxy                                    | 61 wt% (= 42.8 vol%) |                    | 3.6                                                       | –        | 2014 [S15]       |

**Table S2** Surface elemental compositions (atomic %) of BNNS/[bmim][PF<sub>6</sub>] complex, and h-BN measured using X-ray photoelectron spectroscopy (XPS) survey scans.

|                                                       | C                 | B    | N    | O                 | P    | F    | Si                | S   |
|-------------------------------------------------------|-------------------|------|------|-------------------|------|------|-------------------|-----|
| BNNS/[bmim][PF <sub>6</sub> ] complex 2a <sup>a</sup> | 12.6              | 38.5 | 40.3 | 3.39              | 0.31 | 2.63 | 2.32              | 0.0 |
| h-BN <sup>a,b</sup>                                   | 8.60 <sup>c</sup> | 42.5 | 44.5 | 2.90 <sup>c</sup> | 0.0  | 0.0  | 1.60 <sup>c</sup> | 0.0 |

<sup>a</sup> Dried under vacuum at 80 °C for 12 h before XPS measurements. <sup>b</sup> Grade: UHP-1K, Showa Denko K. K., Japan, BN purity: 99.9%. <sup>c</sup> Surface contamination and adsorption of organic substances usually observed on BN surfaces. XPS sample surfaces are easily contaminated by impurities such as carbon and oxygen atoms from the atmosphere.<sup>S9,S16</sup>

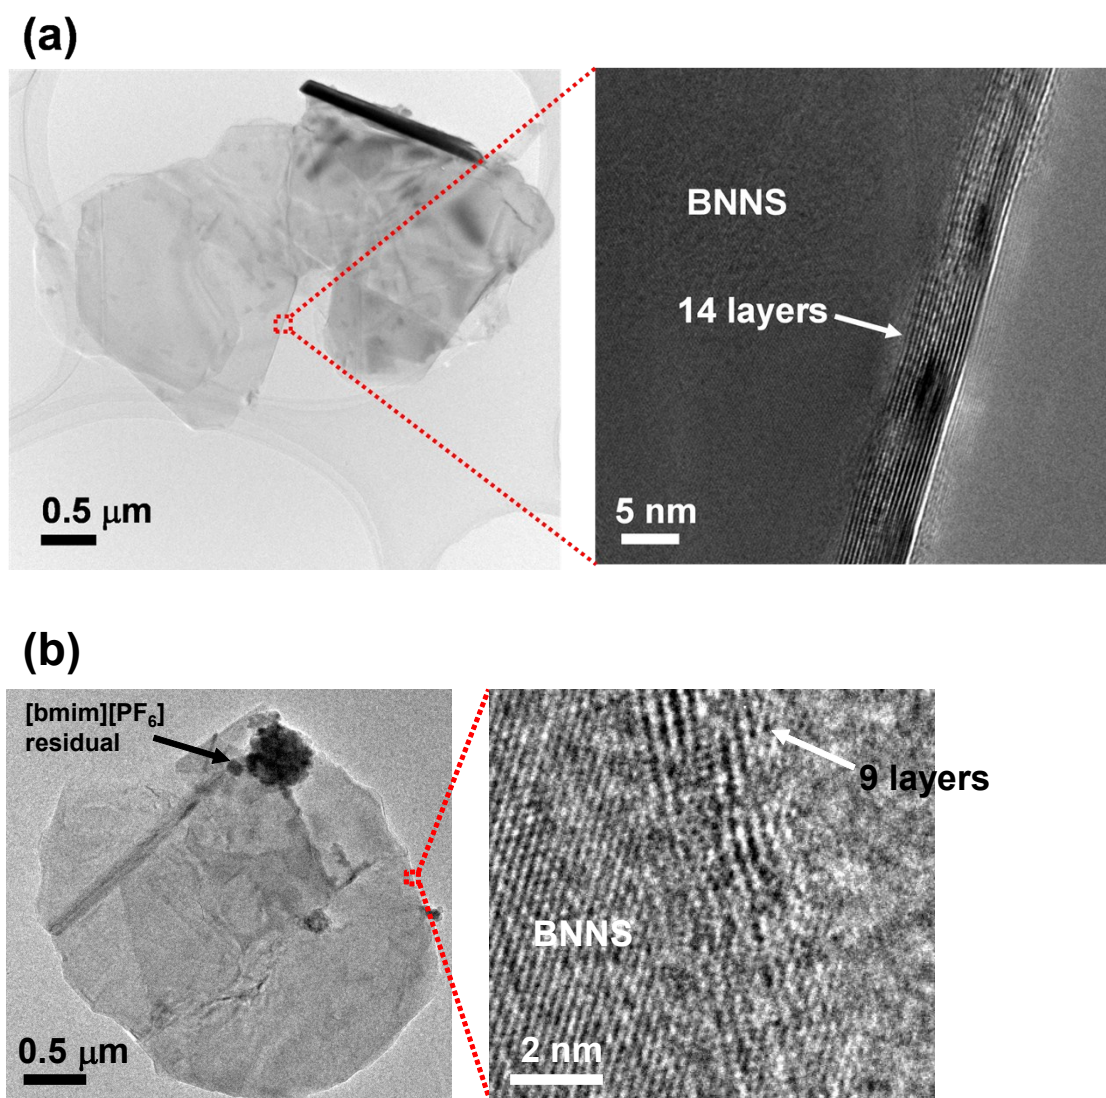

**Fig. S1** (a) High-resolution transmission electron microscopy (HRTEM) images of BNNS/[bmim][Tf<sub>2</sub>N] complexes. (b) HRTEM images of BNNS/[bmim][PF<sub>6</sub>] complexes.

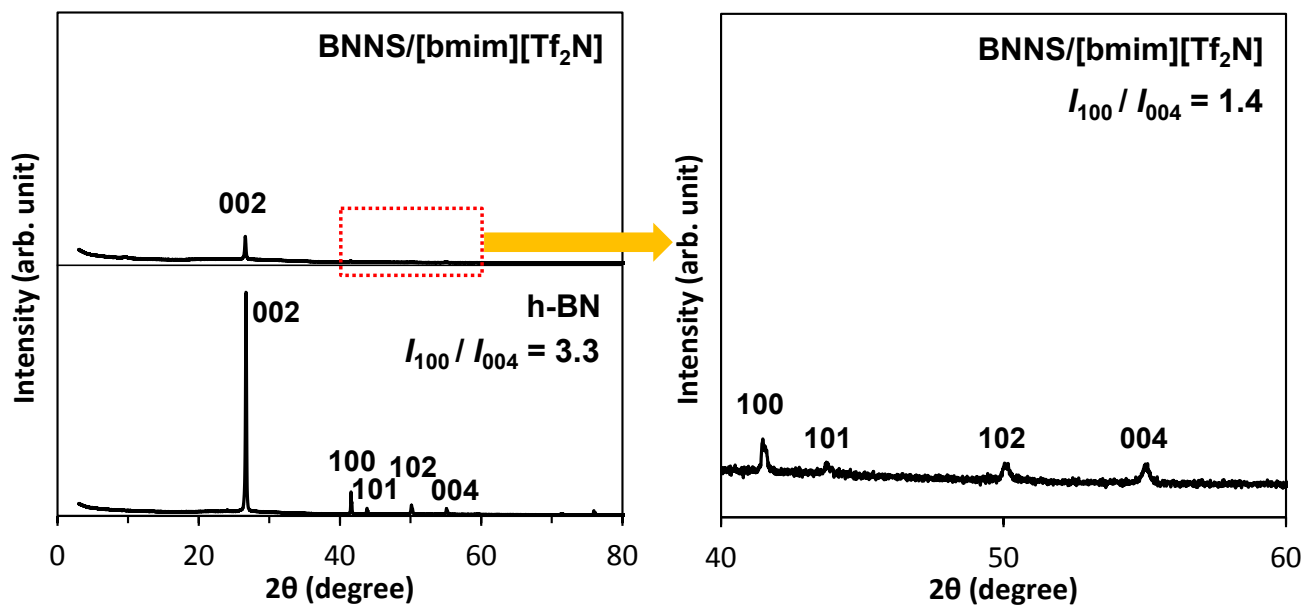

**Fig. S2** X-ray powder diffraction (XRD) spectra of BNNS/[bmim][Tf<sub>2</sub>N] complex and pristine h-BN. Various factors can affect the peak intensity, however each XRD powder sample was measured in the same shape and volume.

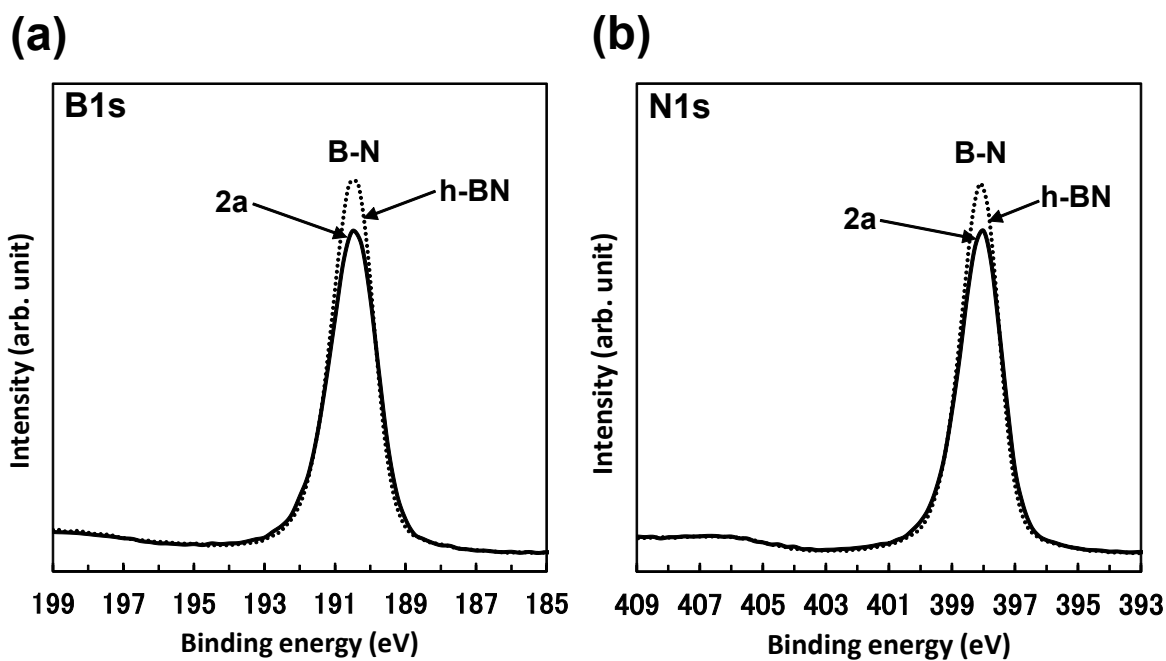

**Fig. S3** (a) B 1s and (b) N 1s XPS spectra of BNNS/[bmim][PF<sub>6</sub>] complex **2a**, and h-BN.

**(a)**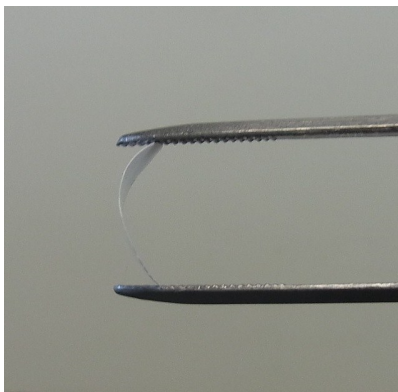**(b)**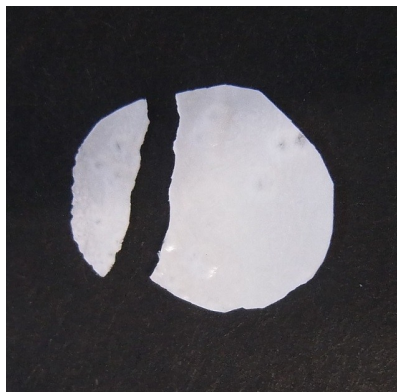

**Fig. S4** Photographs of films to show their flexibility. (a) BNNS/[bmim][PF<sub>6</sub>]/PMMA composite film containing 24.5 wt% of BNNS. (b) h-BN/PMMA (24.5 wt%/75.5 wt%) composite film broken by bending. The BNNS/[bmim][PF<sub>6</sub>]/PMMA composite film showed good flexibility and it was not broken and not cracked after bending. Meanwhile, the h-BN/PMMA composite film is much more brittle and has rough surface appearance. The h-BN/PMMA composite film was easily broken by bending.

**(a)**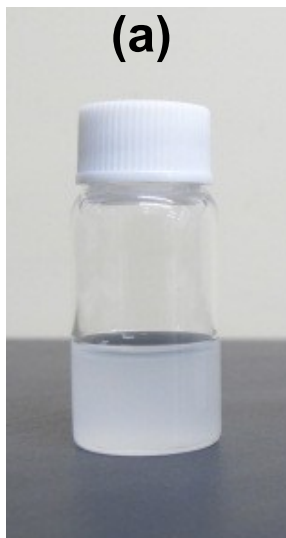**(b)**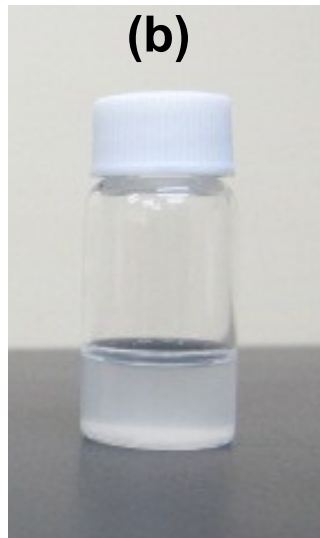

**Fig. S5** Photographs of (a) BNNS/[bmim][PF<sub>6</sub>] dispersion in *N*-methyl-2-pyrrolidone (NMP) and (b) BNNS/[bmim][PF<sub>6</sub>] dispersions in dimethylformamide (DMF). Each photograph was taken after letting each initial BNNS dispersion stand for 1 h. The initial dispersion was prepared after 10 min bath-sonication of a mixture of BNNS/[bmim][PF<sub>6</sub>] complex **2b** and solvent (initial BNNS concentration in

NMP or DMF was adjusted to 0.5 mg mL<sup>-1</sup>). BNNS/[bmim][PF<sub>6</sub>] gave stable BNNS dispersion in NMP (BNNS concentration, ~0.5 mg mL<sup>-1</sup>), although most of the BNNS/[bmim][PF<sub>6</sub>] complex had precipitated in DMF after standing for 1 h.

#### 4. References

- S1. F. Liu, Q. Li, Z. Li, Y. Liu, L. Dong, C. Xiong and Q. Wang, *Compos. Sci. Technol.*, 2017, **142**, 139.
- S2. X. Wang, A. Pakdel, J. Zhang, Q. Weng, T. Zhai, C. Zhi, D. Golberg and Y. Bando, *Nanoscale Res. Lett.*, 2012, **7**, 662.
- S3. X. Wu, Z. Yang, W. Kuang, Z. Tang and B. Guo, *Composites: Part A*, 2017, **94**, 77.
- S4. S S. Li, T. Yang, H. Zou, M. Liang and Y. Chen, *High Perform. Polym.*, 2017, **29**, 315.
- S5. R. -C. Zhang, D. Sun, A. Liu, S. Askari, M. Macias-Montero, P. Joseph, D. Dixon, K. Ostrikov, P. Maguire and D. Mariotti, *ACS Appl. Mater. Interfaces*, 2016, **8**, 13567.
- S6. S. Zhang, G. Lian, H. Si, J. Wang, X. Zhang, Q. Wang and D. Cui, *J. Mater. Chem. A*, 2013, **1**, 5105.
- S7. W. -L. Song, P. Wang, L. Cao, A. Anderson, M. J. Mezziani, A. J. Farr and Y. -P. Sun, *Angew. Chem. Int. Ed.*, 2012, **51**, 6498.
- S8. X. Huang, S. Wang, M. Zhu, K. Yang, P. Jiang, Y. Bando, D. Golberg and C. Zhi, *Nanotechnology*, 2015, **26**, 015705.
- S9. T. Morishita and H. Okamoto, *ACS Appl. Mater. Interfaces*, 2016, **8**, 27064.
- S10. X. Zeng, L. Ye, S. Yu, H. Li, R. Sun, J. Xu and C. -P. Wong, *Nanoscale*, 2015, **7**, 6774.
- S11. F. Wang, Y. Yao, X. Zeng, T. Huang, R. Sun, J. Xu and C. -P. Wong, *RSC Adv.*, 2016, **6**, 41630.
- S12. X. -B. Wang, Q. Weng, X. Wang, X. Li, J. Zhang, F. Liu, X. -F. Jiang, H. Guo, N. Xu, D. Golberg and Y. Bando, *ACS Nano*, 2014, **8**, 9081.
- S13. J. Yu, H. Mo and P. Jiang, *Polym. Adv. Technol.*, 2015, **26**, 514.
- S14. M. -H. Tsai, I. -H. Tseng, J. -C. Chiang and J. -J. Li, *ACS Appl. Mater. Interfaces*, 2014, **6**, 8639.

S15. K. Kim, M. Kim and J. Kim, *Compos. Sci. Technol.* 2014, **103**, 72.

S16. M. R. Uddin, S. Majety, J. Li, J. Y. Lin and H. X. Jiang, *J. Appl. Phys.*, 2014, **115**, 093509.
